# Supplementary material for: Comparison of Ameliorative Effects between Probiotic and Biodegradable Bacillus subtilis on Zearalenone Toxicosis in Gilts
Source: MDPI journal article supplement (doi:10.3390/toxins13120882), 2021-12-10
Supplement: s1 [file s1]

# Supplementary Materials: Comparison of Ameliorative Effects between Probiotic and Biodegradable *Bacillus subtilis* on Zearalenone Toxicosis in Gilts

Wenqiang Shen, Yaojun Liu, Xinyue Zhang, Xiong Zhang, Xiaoping Rong, Lihong Zhao, Cheng Ji, Yuanpei Lei, Fengjuan Li, Jing Chen and Qiugang Ma

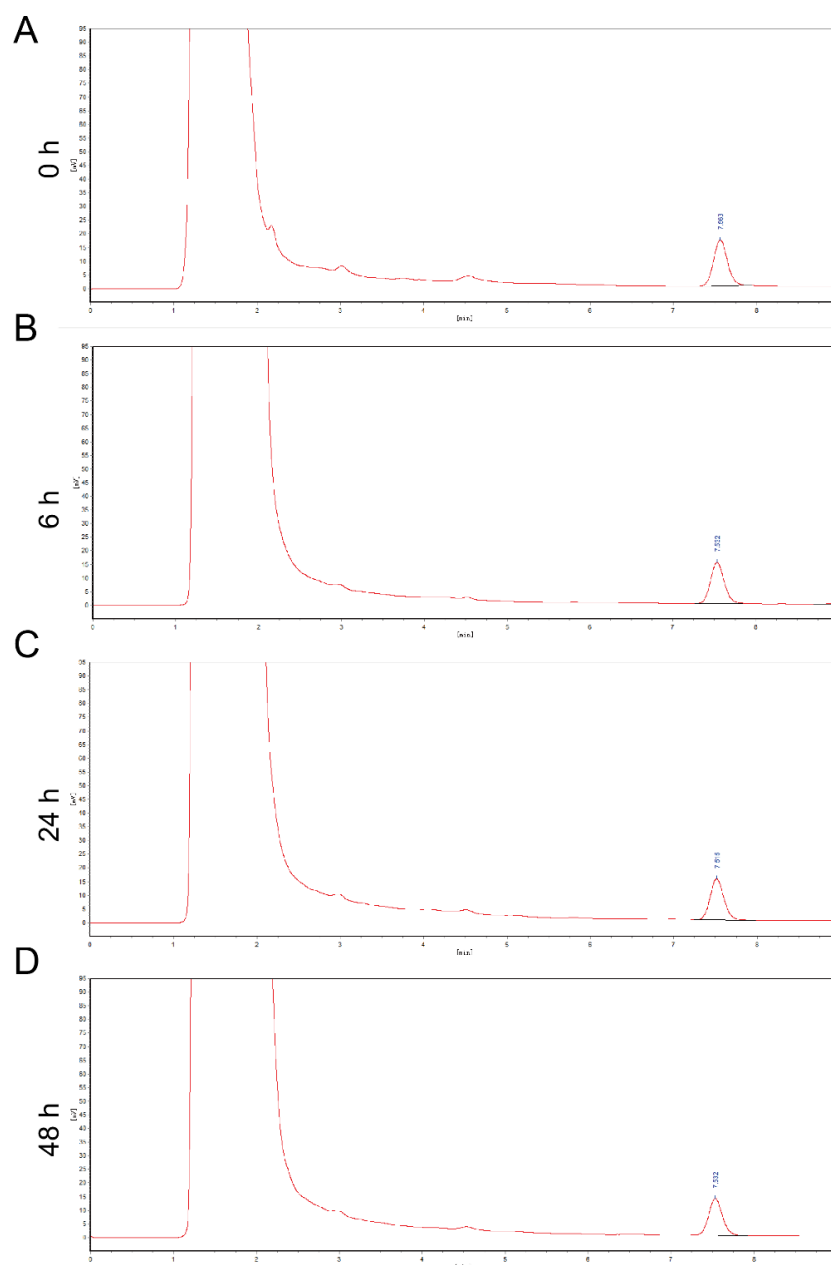

**Figure S1.** The representative HPLC-chromatograms of ZEN-degradation by *Bacillus subtilis* ANSB010 at 0h (A), 6h (B), 24h(C) and 48h (D). x-axis, retention time (min); y-axis, response value (mAU).

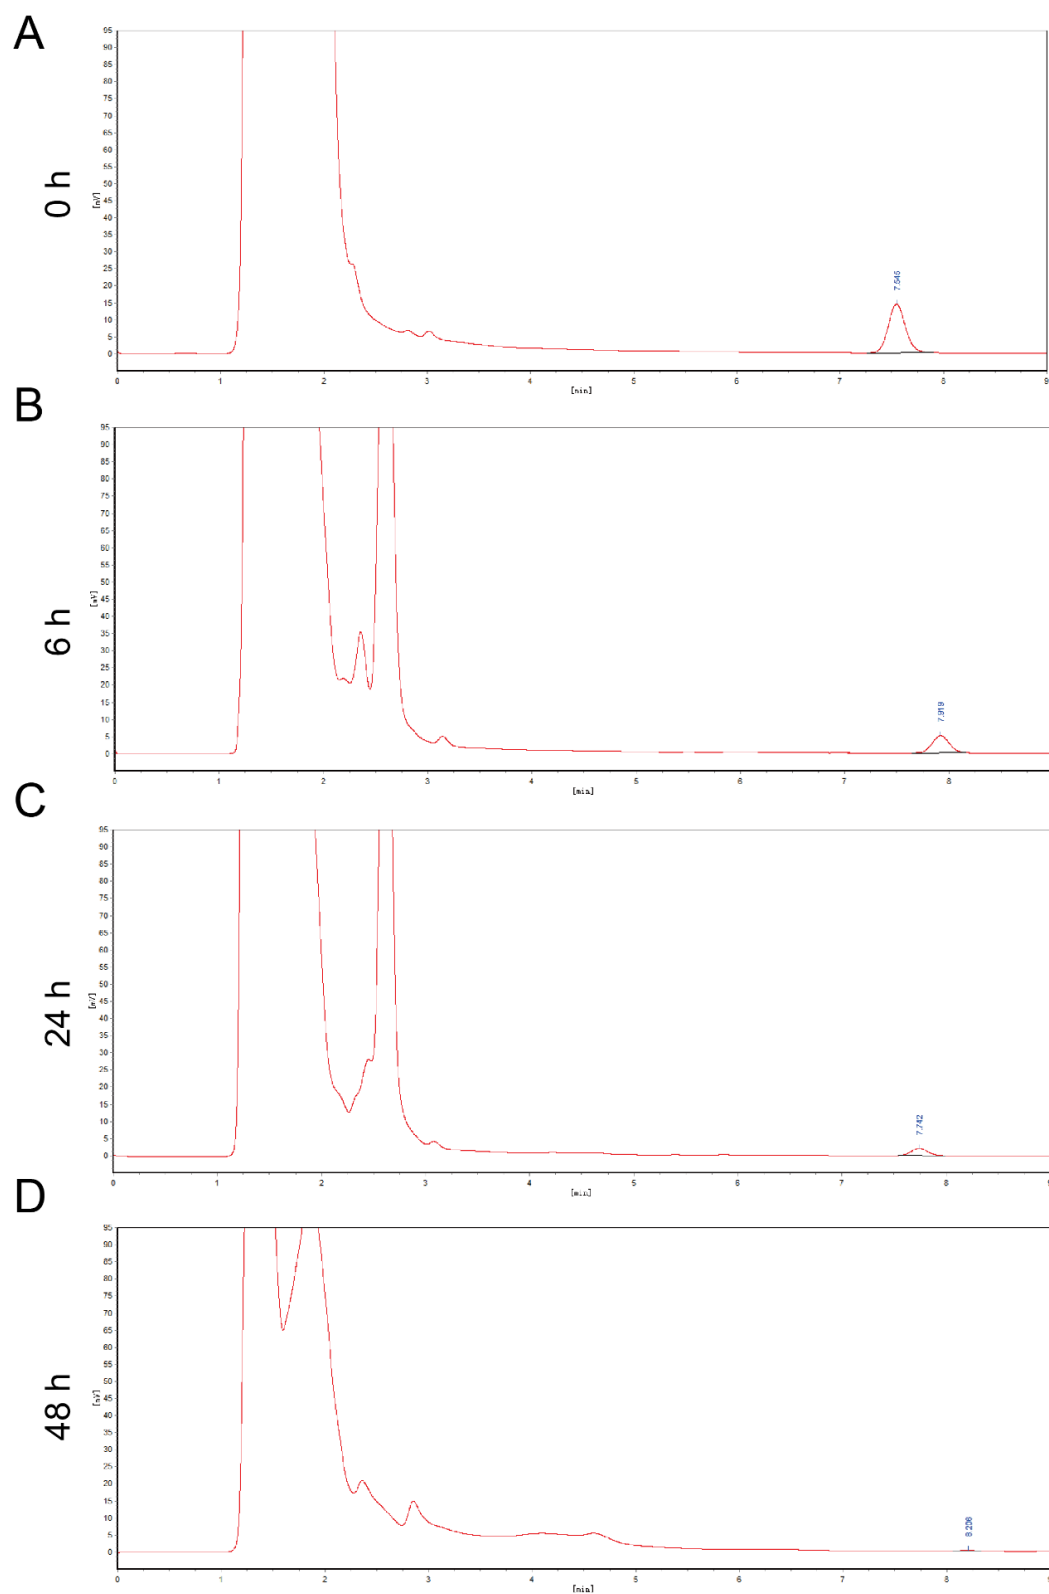

**Figure S2.** The representative HPLC-chromatograms of ZEN-degradation by *Bacillus subtilis* ANSB01G at 0h (A), 6h (B), 24h (C) and 48h (D). x-axis, retention time (min); y-axis, response value (mAU).

## 16S rDNA sequence of ANSB010:

GCTCCCTGATGTTAGCGGGCGGACGGGTGAGTAACACGTGGGTAACTGCCTGTAA  
GACTGGGATAACTCCGGGAAACCGGGGCTAATACCGGATGGTTGTTTGAACCGCA  
TGTTCAAACATAAAAGGTGGCTTCGGCTACCACTTACAGATGGACCCGCGGCGC  
ATTAGCTAGTTGGTGAGGTAACGGCTCACCAAGGCAACGATGCGTAGCCGACCTG  
AGAGGGTGATCGGCCACACTGGGACTGAGACACGGCCCAGACTCCTACGGGAGG  
CAGCAGTAGGGAATCTTCCGCAATGGACGAAAGTCTGACGGAGCAACGCCGCGT  
GAGTGATGAAGGTTTTTCGGATCGTAAAGCTCTGTTGTTAGGGAAGAACAAGTACC  
GTTTCAATAGGGCGGTACCTTGACGGTACCTAACCAGAAAGCCACGGCTAACTAC  
GTGCCAGCAGCCGCGGTAATACGTAGGTGGCAAGCGTTGTCCGGAATTATTGGGC  
GTAAAGGGCTCGCAGGCGGTTTTCTTAAGTCTGATGTGAAAGCCCCCGGCTCAACC  
GGGAGGGTCATTGGAACTGGGGAAGTTGAGTGCAGAAGAGGAGAGTGGAATT  
CCACGTGTAGCGGTGAAATGCGTAGAGATGTGGAGGAACACCAGTGGCGAAGGC  
GACTCTCTGGTCTGTAAGTACGCTGAGGAGCGAAAGCGTGGGGAGCGAACAGG  
ATTAGATACCCTGGTAGTCCACGCCGTAAACGATGAGTGCTAAGTGTAGGGGGT  
TCCGCCCTTAGTGCTGCAGCTAACGCATTAAGCACTCCGCCTGGGGAGTACGGTC  
GCAAGACTGAACTCAAAGGAATTGACGGGGGGCCCGCACAAGCGGTGGAGCATG  
TGTTTTAATTCGAAGCAACGCGAAGAACCCTTACCAGGTCTTGACATCCTCTGACAA  
TCCTAGAGATAGGACGTCCCTTCGGGGGCGAGAGTGACAGGTGGTGCATGGTTGT  
CGTCAGCTCGTGCTGAGATGTTGGGTAAAGTCCCGCAACGAGCGCAACCCTTGA  
TCTTAGTTGCCAGCATTGAGTTGGGCACTCTAAGGTGACTGCCGGTGACAAACCGG  
AGGAAGGTGGGGATGACGTCAAATCATCATGCCCCTTATGACCTGGGCTACACAC  
GTGCTACAATGGACAGAACAAAGGGCAGCGAAACCGCGAGGTTAAGCCAATCCC  
ACAAATCTGTTCTCAGTTCGGATCGCAGTCTGCAACTCGACTGCGTGAAGCTGGAA  
TCGCTAGTAATCGCGGATCAGCATGCCGCGGTGAATACGTTCCCGGGCCTTGTA  
CACCGCCCGTCACACCACGAGAGTTTGTAAACACCCGAAGTC

## 16S rDNA sequence of ANSB01G:

TGCAGTCGAGCGGACAGATGGGAGCTTGCTCCCTGATGTTAGCGGGCGGACGGGTG  
AGTAACACGTGGGTAACTGCCTGTAAGACTGGGATAACTCCGGGAAACCGGGG  
TAATACCGGATGGTTGTTTGAACCGCATGGTTCAGACATAAAAGGTGGCTTCGGCT  
ACCACTTACAGATGGACCCGCGGCGCATTAGCTAGTTGGTGAGGTAACGGCTCAC  
CAAGGCGACGATGCGTAGCCGACCTGAGAGGGTGATCGGCCACACTGGGACTGA  
GACACGGCCCAGACTCCTACGGGAGGCAGCAGTAGGGAATCTTCCGCAATGGAC  
GAAAGTCTGACGGAGCAACGCCGCGTGAGTGATGAAGGTTTTTCGGATCGTAAAGC  
TCTGTTGTTAGGGAAGAACAAGTGCCGTTCAAATAGGGCGGCACCTTGACGGTAC  
CTAACCAGAAAGCCACGGCTAACTACGTGCCAGCAGCCGCGGTAATACGTAGGTG  
GCAAGCGTTGTCCGGAATTATTGGGCGTAAAGGGCTCGCAGGCGGTTTTCTTAAGTC  
TGATGTGAAAGCCCCCGGCTCAACCGGGGAGGGTCATTGGAACTGGGGAAGTTG  
AGTGCAGAAGAGGAGAGTGGAATTCACGTGTAGCGGTGAAATGCGTAGAGATG  
T6GGAGGAACACCAGTGGCGAAGGCGACTCTCTGGTCTGTAAGTACGCTGAGGA  
GCGAAAGCGTGGGGAGCGAACAGGATTAGATACCCTGGTAGTCCACGCCGTAAA  
CGATGAGTGCTAA7GTGTTAGGGGGTTTTCCGCCCTTAGTGCTGCAGCTAACGCAT

TAAGCACTCCGCCTGGGGAGTACGGTCGCAAGACTGAAACTCAAAGGAATTGACG  
GGGGCCCCGCACAAGCGGTGGAGCATGTGGTTTAATTCTGAAGCAACGCGAAGAAC  
CTTACCAGGTCTTGACATCCTCTGACAATCCTAGAGATAGGACGTCCCCTTCGGGG  
GCAGAGTGACAGGTGGTGCATGGTTGTCGTCAGCTCGTGTCGTGAGATGTTGGGT  
AAGTCCCGCAACGAGCGCAACCCTTGATCTTAGTTGCCAGCATTTCAGTTGGGCACT  
CTAAGGTGACTGCCGGTGACAAACCGGAGGAAGGTGGGGATGACGTCAAATCAT  
CATGCCCCCTTATGACCTGGGCTACACACGTGCTACAATGGACAGAACAAAGGGCA  
GCGAAACCGCGAGGTTAAGCCAATCCCACAAATCTGTTCTCAGTTCGGATCGCAG  
TCTGCAACTCGACTGCGTGAAGCTGGAATCGCTAGTAATCGCGGATCAGCATGCC  
GCGGTGAATACGTTCCCGGGCCTTGTACACACCGCCCGTCACACCACGAGAGTTTG  
TAACACCCGAAGTCGG TGAGGTAACCTTTAGGAGCC AGCCGCCGAAGG
